# Supplementary material
Source: publisher figshare collection journal article supplement (https://plos.figshare.com/articles/dataset/_/3415684)
Supplement: Supplementary file 1 [file 1]

Archive with 6 entries (6 files):
- S1 Fig.TIFF
- S2 Fig.TIFF
- S3 Fig.TIF
- S1 File.PDF
- S1 Table.DOC
- S2 Table.DOC
