# Supplementary material
Source: publisher figshare collection journal article supplement (https://plos.figshare.com/articles/dataset/_/3415684)
Supplement: Supplementary file 1 [file 1 › S1 File.PDF]

### **Literature search strategy**

We identified relevant studies via an electronic search using MEDLINE. Our MEDLINE search was performed until November 7<sup>th</sup>, 2014 (date last searched). Our electronic searches were supplemented by manual scanning of the reference lists of all relevant studies and review articles. MEDLINE search combined search terms related to bowel preparation, adenoma and polyp detection, colonoscopy and bowel preparation scales.

The following individual searches were performed:

- (Adenoma detection OR polyp detection) AND bowel preparation (95)
- colonoscopy AND Aronchick scale (29)
- colonoscopy AND Ottawa scale (44)
- colonoscopy AND (Boston bowel preparation scale OR BBPS) (25)
- tandem colonoscopy AND (adenoma OR polyp) (47)
